# Supplementary material for: The aperiodic exponent of subthalamic field potentials reflects excitation/inhibition balance in Parkinsonism
Source: eLife journal article supplement (doi:10.7554/elife.82467), 2023-02-22
Supplement: supp [file elife-82467-supp-v1.zip]

Archive with 6 entries (6 files):
- elife_poa_e82467_Figure_1_figure_supplement_1.pdf
- elife_poa_e82467_Figure_1_figure_supplement_2.pdf
- elife_poa_e82467_Figure_2_figure_supplement_1.pdf
- elife_poa_e82467_Figure_2_figure_supplement_2.pdf
- elife_poa_e82467_Figure_3_figure_supplement_1.pdf
- elife_poa_e82467_Source_code_1.zip
