# Supplementary figures and images for: The aperiodic exponent of subthalamic field potentials reflects excitation/inhibition balance in Parkinsonism
Source: eLife journal article supplement (doi:10.7554/elife.82467), 2023-02-22

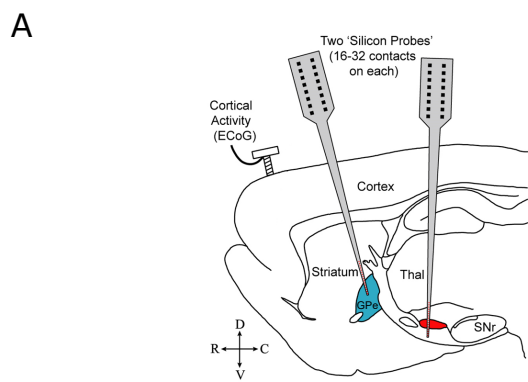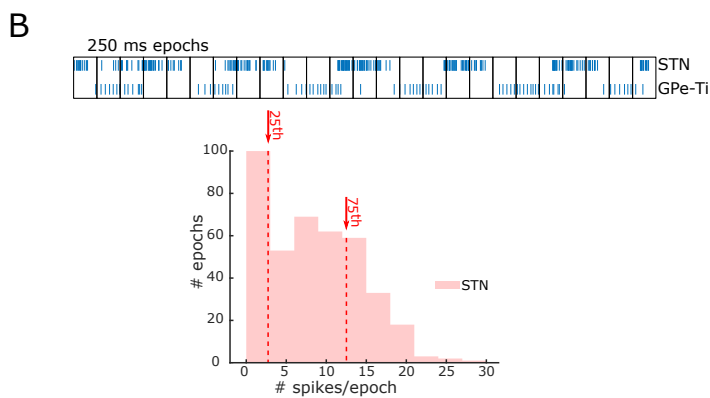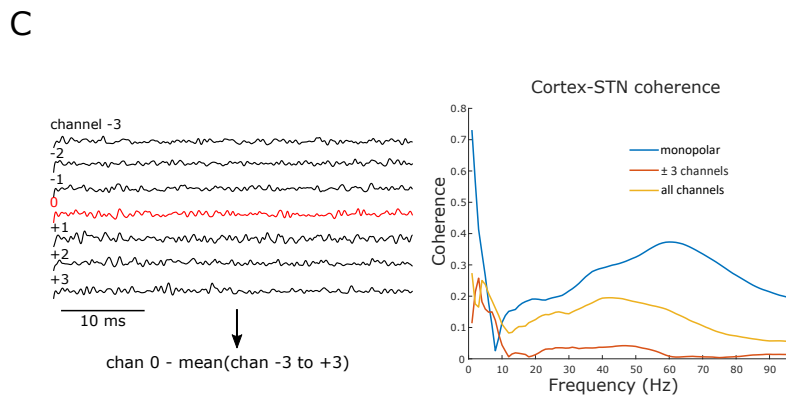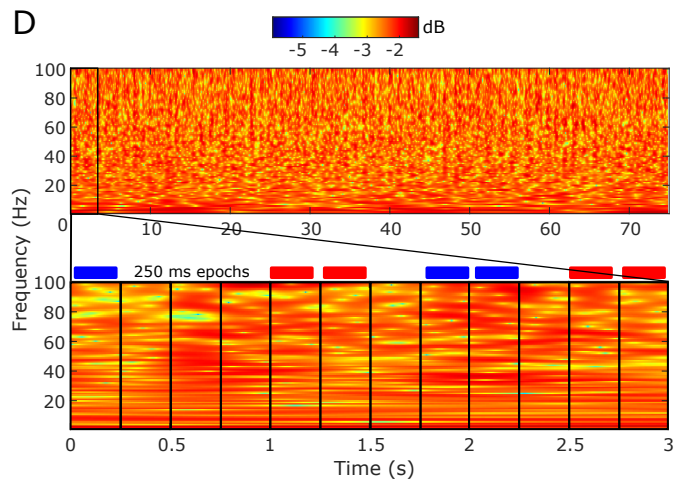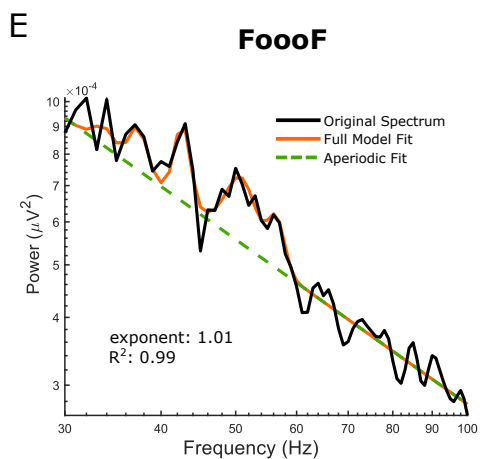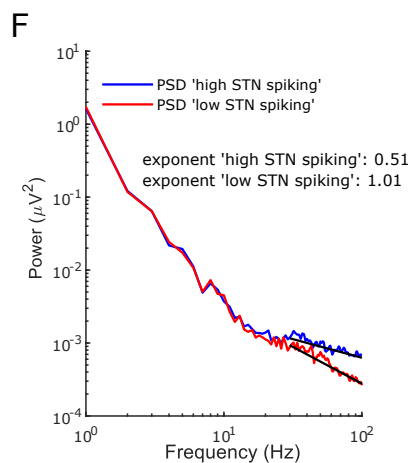

Supplement: supp [file elife-82467-supp-v1.zip › elife_poa_e82467_Figure_1_figure_supplement_1.pdf]

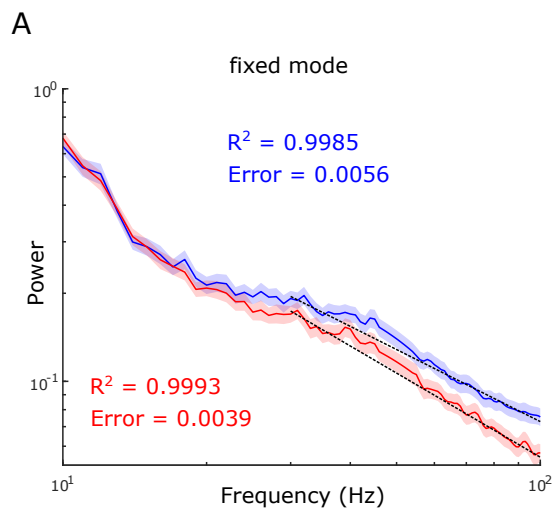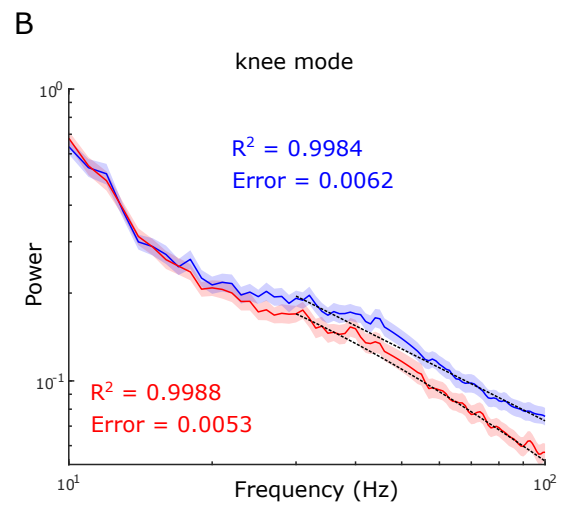

Supplement: supp [file elife-82467-supp-v1.zip › elife_poa_e82467_Figure_1_figure_supplement_2.pdf]

A Fitting range

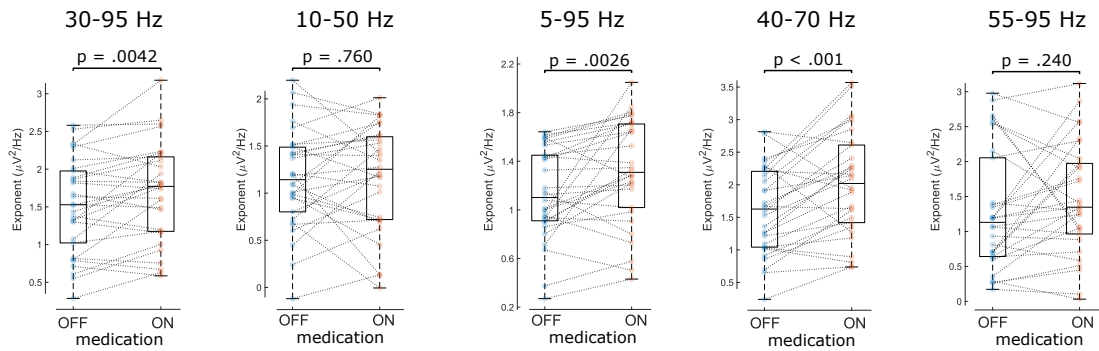

B Peak Threshold

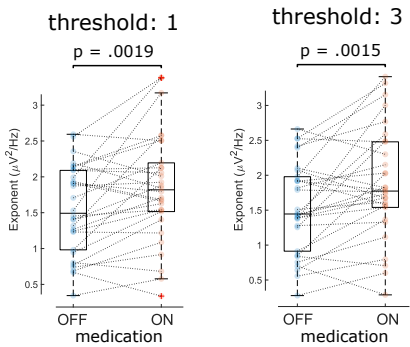

C Peak Width Limits

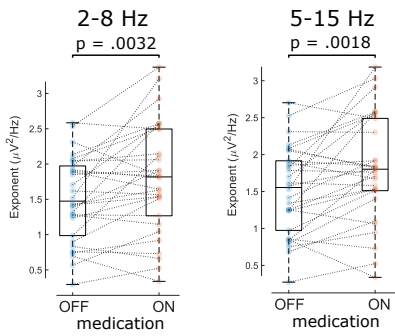

D Aperiodic Mode: 'knee'

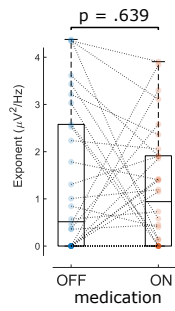

Supplement: supp [file elife-82467-supp-v1.zip › elife_poa_e82467_Figure_2_figure_supplement_1.pdf]

A

Spectral Changes with medication

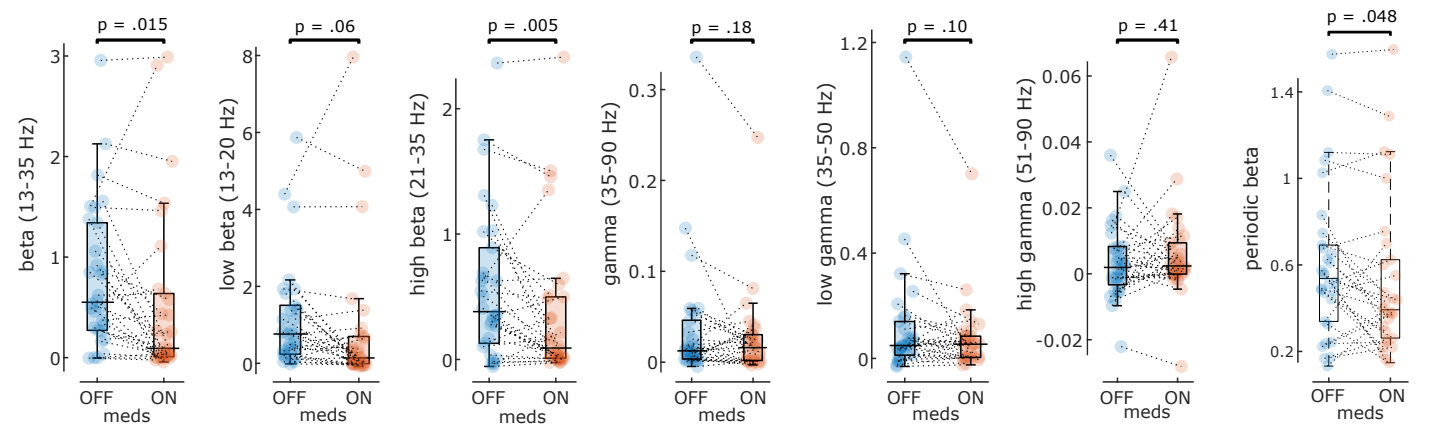

B

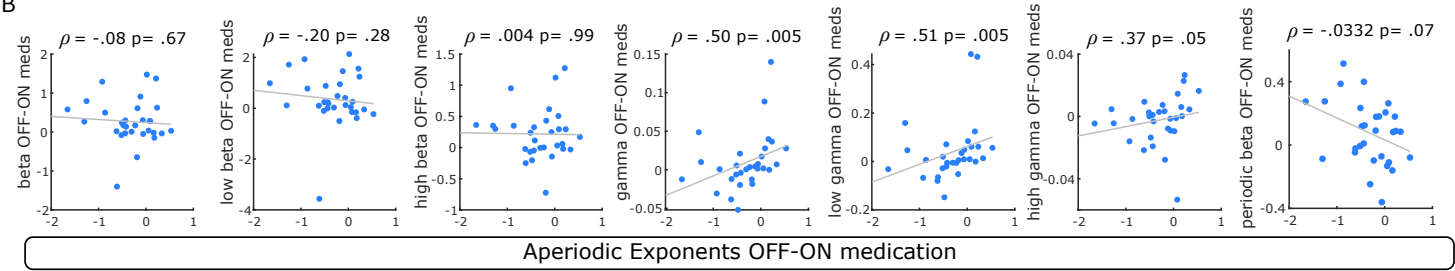

C

Spectral Changes with 130 Hz STN-DBS

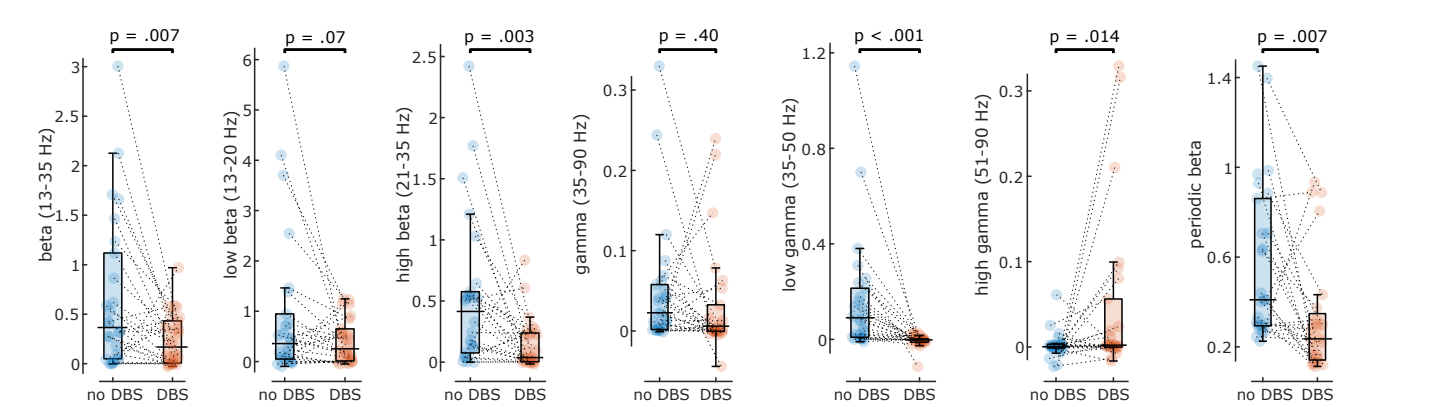

D

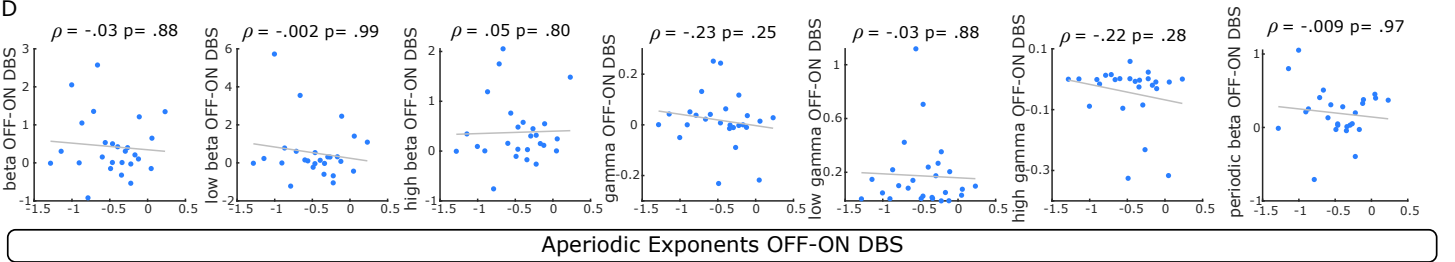

Supplement: supp [file elife-82467-supp-v1.zip › elife_poa_e82467_Figure_2_figure_supplement_2.pdf]

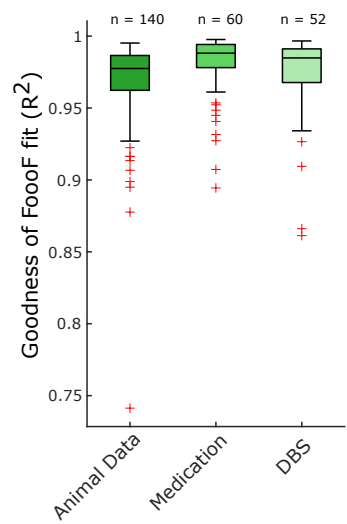

Supplement: supp [file elife-82467-supp-v1.zip › elife_poa_e82467_Figure_3_figure_supplement_1.pdf]
